# Supplementary material for: Implementation of US Post-Acute Care Payment Reform and COVID-19 Policies: Examining Experiences of Health System Leaders, Staff, Patients, and Family Caregivers—A Protocol
Source: MDPI journal article supplement (doi:10.3390/ijerph20206959), 2023-10-23
Supplement: s1 [file s1]

**Supplemental File S6: SNF and HHA Organizational Characteristics**

| <b>Domain</b>                                                   | <b>Data Source</b>                        | <b>Description of variables</b>                                                                                                         |
|-----------------------------------------------------------------|-------------------------------------------|-----------------------------------------------------------------------------------------------------------------------------------------|
| <b>NH Characteristics</b>                                       |                                           |                                                                                                                                         |
| Region                                                          | CMS Provider of Services File             | <ul style="list-style-type: none"> <li>Northeast, South, Midwest, West</li> </ul>                                                       |
| State                                                           | CMS Provider of Services File             | <ul style="list-style-type: none"> <li>2 letter state code, indicating the state in the US where the SNF/HHA is located</li> </ul>      |
| Urbanicity indicator based on Core Based Statistical Area codes | CMS Provider of Services File             | <ul style="list-style-type: none"> <li>Urban</li> <li>Rural</li> </ul>                                                                  |
| Profit status                                                   | CMS Provider of Services File             | <ul style="list-style-type: none"> <li>For profit</li> <li>Non-profit</li> <li>Government owned</li> </ul>                              |
| Chain affiliation                                               | Long Term Care Focus                      | <ul style="list-style-type: none"> <li>Dichotomous indicator for SNF being part of a chain</li> </ul>                                   |
| Branch affiliation                                              | CMS Provider of Services File             | <ul style="list-style-type: none"> <li>Indicator of HHAs that operates branches (not the same as chain status)</li> </ul>               |
| SNF within a Hospital                                           | CMS Care Compare for SNF                  | <ul style="list-style-type: none"> <li>Dichotomous indicator for a SNF that is located within a hospital</li> </ul>                     |
| Size                                                            | CMS Provider of Services File             | <ul style="list-style-type: none"> <li>Number of certified beds for SNFs</li> <li>Number of episodes for HHAs</li> </ul>                |
| CMS quality 5-star rating for HHA                               | CMS Care Compare for HHA                  | <ul style="list-style-type: none"> <li>1-5 stars</li> </ul>                                                                             |
| CMS overall 5-Star rating for SNF                               | CMS Care Compare for SNF                  | <ul style="list-style-type: none"> <li>1-5 stars</li> </ul>                                                                             |
| CMS staffing 5-star rating for SNF                              | CMS Care Compare for SNF                  | <ul style="list-style-type: none"> <li>1-5 stars</li> </ul>                                                                             |
| CMS short-stay quality measures 5-star rating for SNF           | CMS Care Compare for SNF                  | <ul style="list-style-type: none"> <li>1-5 stars</li> </ul>                                                                             |
| CMS health inspections 5-star rating for SNF                    | CMS Care Compare for SNF                  | <ul style="list-style-type: none"> <li>1-5 stars</li> </ul>                                                                             |
| Certification of need (CON)                                     | National Conference of State Legislatures | <ul style="list-style-type: none"> <li>Dichotomous indicator for whether SNF/HHA is located in a state with a CON law</li> </ul>        |
| Moratorium in place                                             | National Conference of State Legislatures | <ul style="list-style-type: none"> <li>Dichotomous indicator for whether SNF is located in a state with a moratoria in place</li> </ul> |
| CMS certification                                               | CMS Provider of Services File             | <ul style="list-style-type: none"> <li>Years certified as a SNF or HHA based on initial date of CMS certification</li> </ul>            |

|                                                        |                                                                                        |                                                                                                                                                                                                                              |
|--------------------------------------------------------|----------------------------------------------------------------------------------------|------------------------------------------------------------------------------------------------------------------------------------------------------------------------------------------------------------------------------|
| Staffing levels for SNF                                | Payroll Based Journal                                                                  | <ul style="list-style-type: none"> <li>• Nursing hours per resident per day</li> <li>• Rehabilitation staff hours per resident per day</li> </ul>                                                                            |
| Use of contract (or in-house) therapy for SNF          | Payroll Based Journal                                                                  | <ul style="list-style-type: none"> <li>• All contract therapy staff</li> <li>• All in-house therapy staff</li> <li>• Mix</li> </ul>                                                                                          |
| County-level COVID indicators                          | USAFacts                                                                               | <ul style="list-style-type: none"> <li>• County-level rates of COVID cases</li> <li>• County-level rates of COVID deaths</li> </ul>                                                                                          |
| Aggregate patient-level measures                       |                                                                                        |                                                                                                                                                                                                                              |
| % of patients dually eligible for Medicare & Medicaid  | Medicare Post-Acute Care and Hospice Provider Utilization and Payment Public Use Files | <ul style="list-style-type: none"> <li>• Percent of Medicare beneficiaries (short-stay residents for SNFs, all patients for HHAs) annually who are dually eligible for Medicaid</li> </ul>                                   |
| % of patients that reside in rural underserved regions | Medicare Post-Acute Care and Hospice Provider Utilization and Payment Public Use Files | <ul style="list-style-type: none"> <li>• Percent of Medicare beneficiaries (short-stay residents for SNFs, all patients for HHAs) annually who receive their Medicare correspondence in a ZIP designated as rural</li> </ul> |
| % Asian or Pacific Islander                            | Medicare Post-Acute Care and Hospice Provider Utilization and Payment Public Use Files | <ul style="list-style-type: none"> <li>• Percent of Medicare beneficiaries (short-stay residents for SNFs, all patients for HHAs) annually who are Asian or Pacific Islanders</li> </ul>                                     |
| % American Indian or Alaska Native                     | Medicare Post-Acute Care and Hospice Provider Utilization and Payment Public Use Files | <ul style="list-style-type: none"> <li>• Percent of Medicare beneficiaries (short-stay residents for SNFs, all patients for HHAs) annually who are American Indian or Alaska Native</li> </ul>                               |
| % non-Hispanic Black patients                          | Medicare Post-Acute Care and Hospice Provider Utilization and Payment Public Use Files | <ul style="list-style-type: none"> <li>• Percent of Medicare beneficiaries (short-stay residents for SNFs, all patients for HHAs) annually who are non-Hispanic Black or African American</li> </ul>                         |
| % Hispanic patients                                    | Medicare Post-Acute Care and Hospice Provider Utilization and Payment Public Use Files | <ul style="list-style-type: none"> <li>• Percent of Medicare beneficiaries (short-stay residents for SNFs, all patients for HHAs) annually who are Hispanic</li> </ul>                                                       |

|                  |                                                                                        |                                                                                                                                                                                                   |
|------------------|----------------------------------------------------------------------------------------|---------------------------------------------------------------------------------------------------------------------------------------------------------------------------------------------------|
| % Other race     | Medicare Post-Acute Care and Hospice Provider Utilization and Payment Public Use Files | <ul style="list-style-type: none"> <li>percent of Medicare beneficiaries (short-stay residents for SNFs, all patients for HHAs) annually with race not elsewhere classified or unknown</li> </ul> |
| % White patients | Medicare Post-Acute Care and Hospice Provider Utilization and Payment Public Use Files | <ul style="list-style-type: none"> <li>percent of Medicare beneficiaries (short-stay residents for SNFs, all patients for HHAs) annually who are non-Hispanic white</li> </ul>                    |
