# Supplementary material for: Implementation of US Post-Acute Care Payment Reform and COVID-19 Policies: Examining Experiences of Health System Leaders, Staff, Patients, and Family Caregivers—A Protocol
Source: MDPI journal article supplement (doi:10.3390/ijerph20206959), 2023-10-23
Supplement: s1 [file s1]

**Supplemental File S5.** Background and Demographic information for interviews

| Variable name       | Questions                                                         | Response options                                                                                                                                                                                                                                                                                                                                                                                    | Interview<br>(A, S, P, F) |
|---------------------|-------------------------------------------------------------------|-----------------------------------------------------------------------------------------------------------------------------------------------------------------------------------------------------------------------------------------------------------------------------------------------------------------------------------------------------------------------------------------------------|---------------------------|
| <b>Demographics</b> |                                                                   |                                                                                                                                                                                                                                                                                                                                                                                                     |                           |
| Age                 | What is your age (in years)?                                      | <ul style="list-style-type: none"> <li>• <i>[insert number in years]</i></li> </ul>                                                                                                                                                                                                                                                                                                                 | A, S, P, F                |
| Race                | How would you best describe your race?                            | <ul style="list-style-type: none"> <li>• American Indian or Native American</li> <li>• Asian</li> <li>• Black or African American</li> <li>• Native Hawaiian or Other Pacific Islander</li> <li>• White</li> <li>• Multiracial</li> <li>• Other <i>[insert open text box]</i></li> <li>• Prefer not to say</li> </ul>                                                                               | A, S, P, F                |
| Ethnicity           | Would you describe yourself as Hispanic or Latino?                | <ul style="list-style-type: none"> <li>• Hispanic or Latino</li> <li>• Not Hispanic or Latino</li> <li>• Prefer not to say</li> </ul>                                                                                                                                                                                                                                                               | A, S, P, F                |
| Gender              | How would you describe your gender?                               | <ul style="list-style-type: none"> <li>• Female</li> <li>• Male</li> <li>• Transgender woman</li> <li>• Transgender man</li> <li>• Non-binary</li> <li>• Other <i>[insert open text box]</i></li> <li>• Prefer not to say</li> </ul>                                                                                                                                                                | A, S, P, F                |
| Education           | What is the highest degree or level of school you have completed? | <ul style="list-style-type: none"> <li>• Less than high school</li> <li>• High school graduate, diploma or the equivalent (for example: GED)</li> <li>• Trade/technical/ vocational training</li> <li>• Associate degree</li> <li>• Bachelor's degree</li> <li>• Master's degree</li> <li>• Doctorate degree</li> <li>• Other <i>[insert open text box]</i></li> <li>• Prefer not to say</li> </ul> | A, S, P, F                |
| Marital status      | How would you describe your marital status?                       | <ul style="list-style-type: none"> <li>• Married</li> <li>• Living with a partner</li> <li>• Separated</li> </ul>                                                                                                                                                                                                                                                                                   | P, F                      |

|                                                       |                                                                                                          |                                                                                                                                                                                                                                                                                                                              |      |
|-------------------------------------------------------|----------------------------------------------------------------------------------------------------------|------------------------------------------------------------------------------------------------------------------------------------------------------------------------------------------------------------------------------------------------------------------------------------------------------------------------------|------|
|                                                       |                                                                                                          | <ul style="list-style-type: none"> <li>• Divorced</li> <li>• Widowed</li> <li>• Never married</li> <li>• Prefer not to say</li> </ul>                                                                                                                                                                                        |      |
| Relationship to Patient                               | What is your relationship to <i>[name of Patient]</i> ?                                                  | <ul style="list-style-type: none"> <li>• Spouse</li> <li>• Parent</li> <li>• Child</li> <li>• Other family</li> <li>• Friend</li> <li>• Other <i>[insert open text box]</i></li> <li>• Prefer not to say</li> </ul>                                                                                                          | F    |
| Shared Residence                                      | Before they were hospitalized, did you and the <i>[name of Patient]</i> live in the same home?           | <ul style="list-style-type: none"> <li>• Yes</li> <li>• No</li> <li>• <i>[If no]:</i> Did you live nearby? <ul style="list-style-type: none"> <li>○ Less than 1 hour away</li> <li>○ Between 1 hour and 3 hours away</li> <li>○ More than 3 hours away</li> <li>○ Unsure</li> <li>○ Prefer not to say</li> </ul> </li> </ul> | F    |
| Household makeup                                      | How many people lived in your home, including yourself, at the time <i>[you/they]</i> were hospitalized? | <ul style="list-style-type: none"> <li>• <i>[insert number]</i></li> <li>• Prefer not to say</li> </ul>                                                                                                                                                                                                                      | P, F |
| Zip code                                              | What was your ZIP code at the time <i>[you/they]</i> were hospitalized?                                  | <ul style="list-style-type: none"> <li>• <i>[insert number]</i></li> <li>• Prefer not to say</li> </ul>                                                                                                                                                                                                                      | P, F |
| Qualifying hospitalization and healthcare utilization |                                                                                                          |                                                                                                                                                                                                                                                                                                                              |      |
| Reason for Hospitalization                            | Can you tell me why <i>[you were/ [name of Patient] was]</i> hospitalized?                               | <ul style="list-style-type: none"> <li>• <i>[insert text]</i></li> </ul>                                                                                                                                                                                                                                                     | P, F |
| Place of Hospitalization                              | Where were <i>[you/they]</i> hospitalized?                                                               | <ul style="list-style-type: none"> <li>• <i>[insert text]</i></li> </ul>                                                                                                                                                                                                                                                     | P, F |
| Length of Hospitalization                             | For how many days were <i>[you/they]</i> in the hospital?                                                | <ul style="list-style-type: none"> <li>• <i>[insert number]</i></li> </ul>                                                                                                                                                                                                                                                   | P, F |
| Health insurance                                      | What kinds of health insurance or health care coverage <i>[do</i>                                        | <ul style="list-style-type: none"> <li>• Private health insurance</li> <li>• Medicare</li> </ul>                                                                                                                                                                                                                             | P, F |

|                               |                                                                                                                                                                   |                                                                                                                                                                                                                                                                                                                                                                                                                                      |      |
|-------------------------------|-------------------------------------------------------------------------------------------------------------------------------------------------------------------|--------------------------------------------------------------------------------------------------------------------------------------------------------------------------------------------------------------------------------------------------------------------------------------------------------------------------------------------------------------------------------------------------------------------------------------|------|
|                               | <i>you/does [name of Patient]] have?</i>                                                                                                                          | <ul style="list-style-type: none"> <li>• Medicare Advantage</li> <li>• Medicare supplement</li> <li>• Medicaid</li> <li>• Military related health care including TRICARE, CHAMPUS, VA health care and CHAMP-VA</li> <li>• Indian Health Service</li> <li>• A state-sponsored health plan</li> <li>• Other government program</li> <li>• Other [insert open text box]</li> <li>• No insurance</li> <li>• Prefer not to say</li> </ul> |      |
| Confirmation of SNF/HHA Care  | Can I confirm that <i>[you/ [name of Patient]]</i> received care from [name of SNF/HHA] after a recent hospitalization?                                           | • <i>[insert text]</i>                                                                                                                                                                                                                                                                                                                                                                                                               | P, F |
| Length of SNF/HHA Care        | About how long <i>[were [you/they] at [name of SNF]/ did [you/they] receive home care from [name of HHA]]?</i>                                                    | • <i>[insert number]</i>                                                                                                                                                                                                                                                                                                                                                                                                             | P, F |
| Prior Use of SNF/HHA Services | Have <i>[you/they]</i> been admitted to a rehabilitation facility like [name of SNF] before?/ Was this <i>[your/their]</i> first time using home health services? | <ul style="list-style-type: none"> <li>• Yes</li> <li>• No</li> </ul>                                                                                                                                                                                                                                                                                                                                                                | P, F |
| <b>Employment</b>             |                                                                                                                                                                   |                                                                                                                                                                                                                                                                                                                                                                                                                                      |      |
| Job role                      | What is your position or official job title at your organization?                                                                                                 | • <i>[insert text]</i>                                                                                                                                                                                                                                                                                                                                                                                                               | A    |
| Job role                      | Can I confirm that you are the/a _____ [position in the facility/organization]?                                                                                   | • <i>[insert text]</i>                                                                                                                                                                                                                                                                                                                                                                                                               | S    |
| Time at organization          | How long have you worked at your organization, in years and months?                                                                                               | • <i>[insert number]</i>                                                                                                                                                                                                                                                                                                                                                                                                             | A    |
| Time at organization          | How long have you been working for [name of organization]?                                                                                                        | • <i>[insert number]</i>                                                                                                                                                                                                                                                                                                                                                                                                             | S    |
| Prior position                | If employment with organization is less than 2 years, did you hold a similar position at another organization?                                                    | <ul style="list-style-type: none"> <li>• Yes</li> <li>• No</li> </ul>                                                                                                                                                                                                                                                                                                                                                                | A, S |
| Time in Healthcare            | How long have you worked in healthcare?                                                                                                                           | • <i>[insert number]</i>                                                                                                                                                                                                                                                                                                                                                                                                             | S    |

|                   |                                                                                      |                                                                                                                       |      |
|-------------------|--------------------------------------------------------------------------------------|-----------------------------------------------------------------------------------------------------------------------|------|
| Hours worked      | How many hours a week do you work?                                                   | <ul style="list-style-type: none"> <li>• <i>[insert number]</i></li> </ul>                                            | A, S |
| Employment status | [In response to hours worked a week] is this considered full time or something else? | <ul style="list-style-type: none"> <li>• Full time</li> <li>• Part-time</li> <li>• Casual</li> <li>• Other</li> </ul> | A, S |

Note: Interview type includes A= Administrator, S= frontline staff of the HHA or SNF, P= SNF or HHA patient, F= family caregiver of the SNF or HHA patient
