# Supplementary material for: Implementation of US Post-Acute Care Payment Reform and COVID-19 Policies: Examining Experiences of Health System Leaders, Staff, Patients, and Family Caregivers—A Protocol
Source: Int J Environ Res Public Health. 2023 Oct 23;20(20):6959. doi: 10.3390/ijerph20206959 (PMC10606322; doi:10.3390/ijerph20206959)
Supplement: Supplementary file 1 [file ijerph-20-06959-s001.zip]

Archive with 6 entries (6 files):
- Supplemental File S1.pdf
- Supplemental File S2.pdf
- Supplemental File S3.pdf
- Supplemental File S4.pdf
- Supplemental File S5.pdf
- Supplemental File S6 final NEL.pdf
